# Supplementary material for: Nickel single atom mediated phosphate functionalization of moss derived biochar effectively enhances electrochemical uranium extraction from seawater
Source: Royal Society of Chemistry journal article supplement (doi:10.1039/d3ta07267c), 2024-01-01
Supplement: d3ta07267c1.pdf [file d3ta07267c1.pdf]

## Supporting Information

### **Nickel single atom mediated phosphate functionalization of moss derived biochar effectively enhances electrochemical uranium extraction from seawater**

Huachuan Feng<sup>1#</sup>, Huanhuan Dong<sup>1#</sup>, Pan He<sup>2#</sup>, Junhui He<sup>3</sup>, Enmin Hu<sup>1</sup>, Zishu Qian<sup>1</sup>, Jin Li<sup>1</sup>,  
Jiejie Li<sup>1</sup>, Wenkun Zhu<sup>\*,1</sup>, Tao Chen<sup>\*,1</sup>

1. State Key Laboratory of Environment-friendly Energy Materials, National Co-innovation  
Center for Nuclear Waste Disposal and Environmental Safety, Sichuan Co-Innovation Center for  
New Energetic Materials, Nuclear Waste and Environmental Safety Key Laboratory of Defense,  
School of Life Science and Engineering, Southwest University of Science and Technology,  
Mianyang, Sichuan 621010, P. R. China.

2. College of Chemistry, Key Laboratory of Radiation Physics & Technology, Ministry of  
Education, Sichuan University, Chengdu, Sichuan 610064, P. R. China.

3. Department of Materials Engineering, Sichuan College of Architectural Technology, Sichuan  
618000, P. R. China

# These authors contributed equally to this work.

\*Corresponding authors.

E-mail addresses: zhuwenkun@swust.edu.cn (W. Zhu), chent@swust.edu.cn (T. Chen).

23

## 24 **1. Experimental section**

### 25 **1.1 Material and Chemicals**

26 The *R. japonicum* L was collected from Zhangjiajie. Dicyandiamide (C<sub>2</sub>H<sub>4</sub>N<sub>4</sub>), nickel (II)  
27 chloride hexahydrate (NiCl<sub>2</sub>·6H<sub>2</sub>O), 70% phytic acid solution, and ethanol were purchased from  
28 Aladdin Biochemical Technology Co., Ltd. (Shanghai, China). All experiments were conducted  
29 using ultrapure water (UPW) with a resistivity of 18.25 mΩ·cm<sup>-1</sup>, and no further purification was  
30 performed on any other reagents before use.

### 31 **1.2 Activity evaluation of catalysts**

32 The prepared sample is utilized as a catalyst for electrocatalytic uranium extraction. Unless  
33 otherwise specified, all experiments are conducted in a three-electrode electrochemical  
34 workstation with Ag/AgCl as the reference electrode, using a material concentration of 0.1  
35 mg·ml<sup>-1</sup>. and a voltage of -1.8 V.

36 After the electrocatalysis, the quantities of UO<sub>2</sub><sup>2+</sup> were measured by UV-Vis (wavelength of  
37 651.8 nm).

38 A formula following as the determining of the ratio of U(VI) removal during photocatalysis:

$$\text{removal ratio} = \frac{C_0 - C_t}{C_0} \times 100\%$$

39  
40 (1)

41 In this formula, C<sub>0</sub> takes for the initial C<sub>U(VI)</sub>, and C<sub>t</sub> takes for the C<sub>U(VI)</sub> while  
42 photocatalysis processing.

### 43 **1.3 The sorption data fitting by isotherm models**

44 Adsorption kinetics were used to analyze the adsorption rate and elucidate the potential  
45 rate-controlling mechanism of the adsorption process. To design the appropriate adsorption  
46 systems, two well-known kinetics models, pseudo-first-order and pseudo-second-order rate  
47 equations are analyzed. The pseudo-first-order and pseudo-second-order equations can be  
48 expressed as follows:

49  $\ln(q_e - q_t) = \ln q_e - k_1 t$  (2)

50  $\frac{t}{q_t} = \frac{1}{k_2 q_e^2} + \frac{t}{q_e}$

51 (3)

52 where  $t$  is the contact time (h),  $q_t$  and  $q_e$  are the amounts of  $\text{UO}_2^{2+}$  absorbed at time  $t$  and at  
53 equilibrium (mg/g), respectively, and  $k_1$  (1/h) and  $k_2$  (g/mg h) are the rate constant.

54 The distribution coefficient  $K_d$  was calculated using the following equation:

55  $K_d = \frac{(C_0 - C_e)}{C_0} \times \frac{V}{m}$

56 (4)

57 Where  $C_0$  and  $C_e$  represent the concentration of  $\text{UO}_2^{2+}$  in the aqueous solution before and  
58 after sorption equilibrium, respectively.  $V$  and  $m$  represent the volume of the aqueous solution  
59 and the weight of the dry sorbent, respectively.

60

#### 61 **1.4 Characterization**

62 Scanning electron microscopy (SEM; Ultra55, Carl Zeiss NTS GmbH, Germany) was used  
63 to investigate the surface morphology of Ni-BC@PO<sub>4</sub> composites. Transmission electron  
64 microscopy (TEM), high-resolution transmission electron microscopy (HRTEM), and electron  
65 diffraction imaging were performed using a field-emission high-resolution transmission electron  
66 microscope (FEI Tecnai G2 F20, FEI, USA) at an accelerating voltage of 200 kV. Aberration-  
67 corrected electron microscopy was employed for (FEI Theims Z, Titan Cubed Themis G2300,  
68 JEM-ARM200F). X-ray diffraction (XRD) patterns of the samples were obtained from 5° to 80°  
69 using an X'Pert PRO (PANalytical, The Netherlands) X-ray diffractometer, with Cu K $\alpha$   
70 ( $\lambda=0.15406$  nm) radiation, a voltage of 60 kV, a current of 50 mA, and a scan rate of 2°/min.  
71 Chemical composition and oxidation state analysis were conducted using a Kratos Axis Ultra  
72 photoelectron spectrometer (Thermo escalab 250Xi, Thermo Fisher, USA) with monochromatic  
73 Al K $\alpha$  radiation. Hydroxyl radicals ( $\bullet\text{OH}$ ) and superoxide radicals ( $\bullet\text{O}_2^-$ ) were determined by

74 electron spin resonance (ESR) spectroscopy using a Bruker A300 instrument. X-ray absorption  
75 near-edge structure (XANES) measurements were recorded at the beamline BL10B at the  
76 National Synchrotron Radiation Laboratory (NSRL) in Hefei, China. Fourier transform infrared  
77 spectroscopy (FT-IR) measurements were performed using a Nexus 670 Thermo Nicolet Fourier  
78 transform infrared spectrometer in pressed KBr pellets. All electrochemical experiments were  
79 conducted at room temperature using a Chi660e electrochemical workstation. Water contact  
80 angle measurements were performed with (German Klux K100).

81

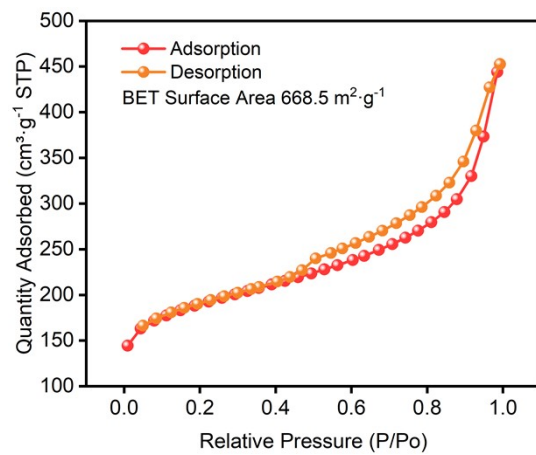

82

83 **Figure S1.** The isothermal adsorption-desorption curve of Ni-BC@PO<sub>4</sub> under nitrogen gas.

84

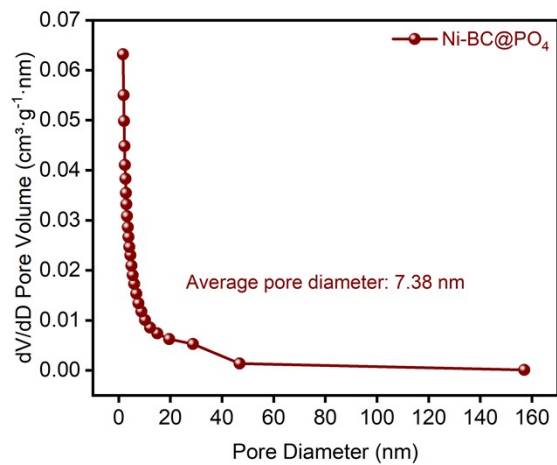

85

86 **Figure S2.** The pore size distribution curve of Ni-BC@PO<sub>4</sub>.

87

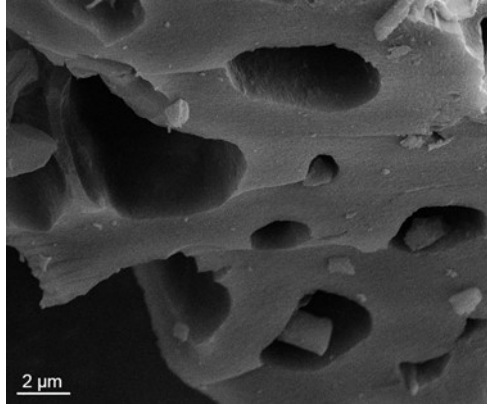

88

89 **Figure S3.** SEM images of BC.

90

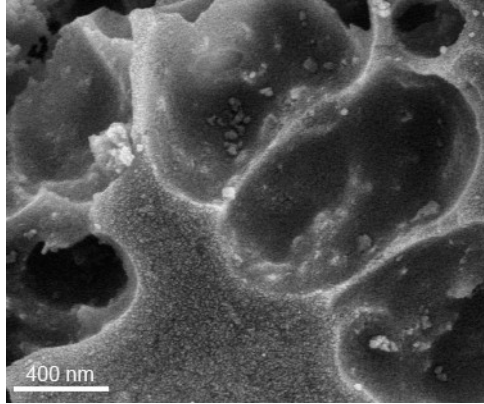

91

92 **Figure S4.** SEM images of Ni-BC@PO<sub>4</sub>.

93



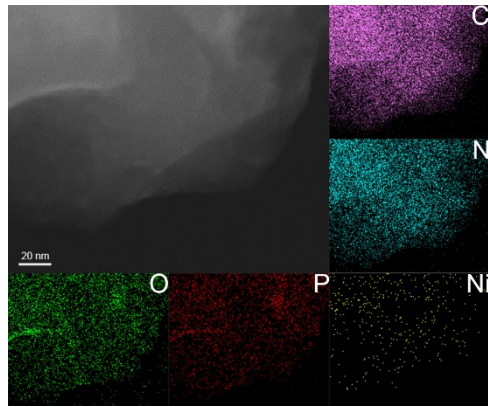

94

95 **Figure S5.** TEM and EDS mapping images of Ni-BC@PO<sub>4</sub> at 20nm.

96

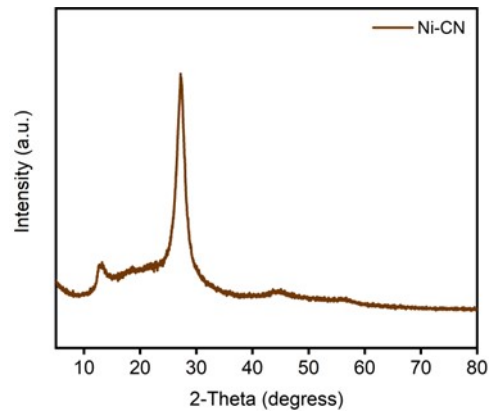

97

98 **Figure S6.** XRD spectrum of Ni-CN.

99

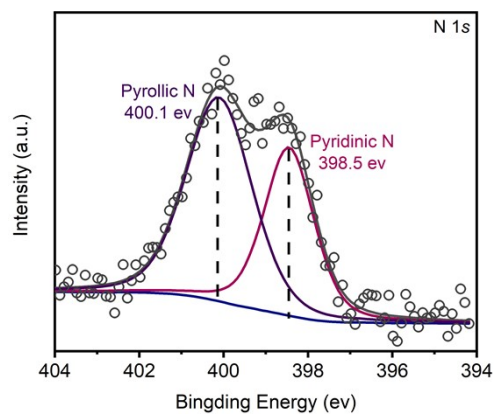

100

101 **Figure S7.** N 1s XPS spectra of BC.

102

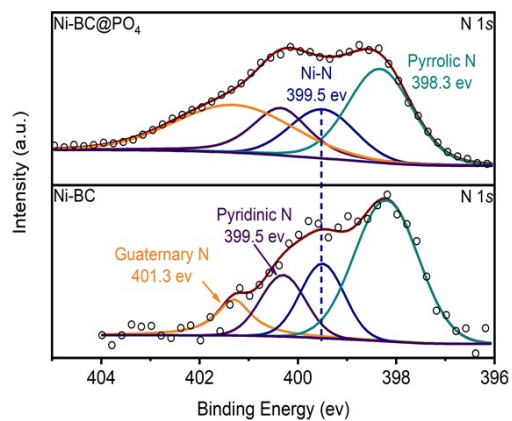

103

104 **Figure S8.** N 1s XPS spectra of Ni-BC and Ni-BC@PO<sub>4</sub>.

105

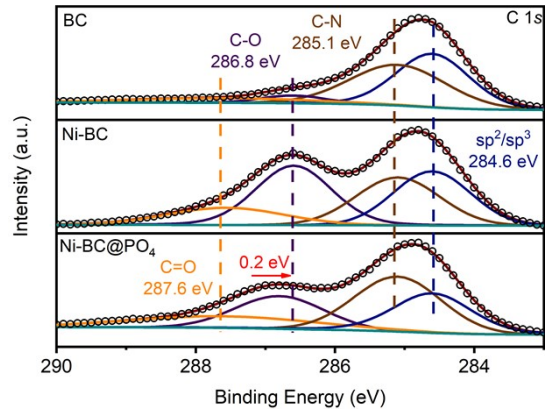

106

107 **Figure S9.** C 1s XPS spectra of BC, Ni-BC, and Ni-BC@PO<sub>4</sub>.

108

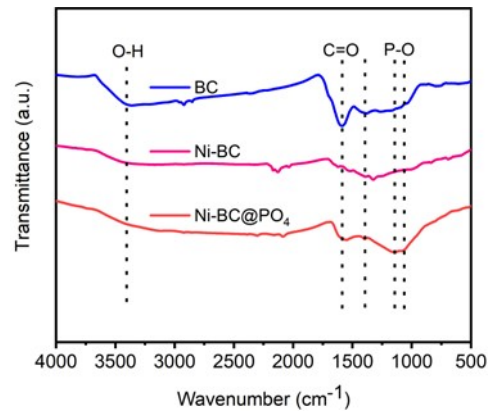

109

110 **Figure S10.** FT-IR spectra of BC, Ni-BC and Ni-BC@PO<sub>4</sub>.

111

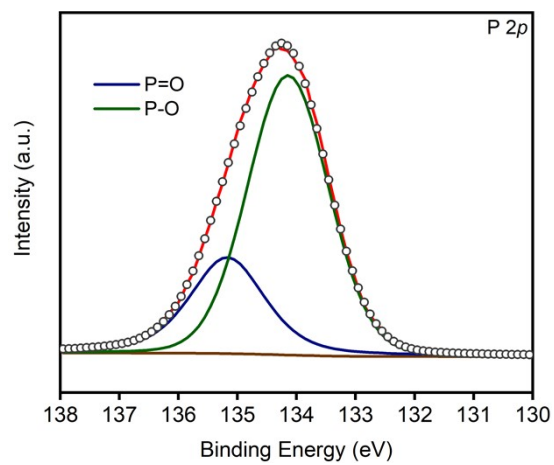

112

113 **Figure S11.** P 2p XPS spectra of Ni-BC@PO<sub>4</sub>.

114

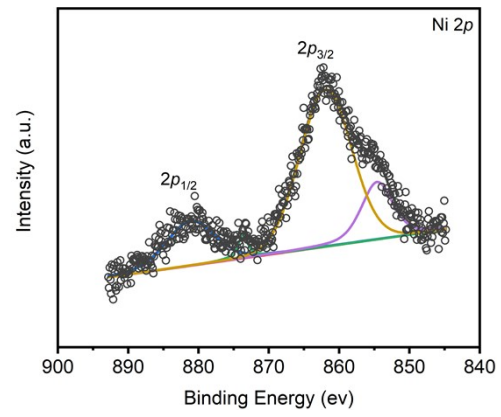

115

116 **Figure S12.** Ni 2*p* XPS spectra of Ni-BC@PO<sub>4</sub>.

117



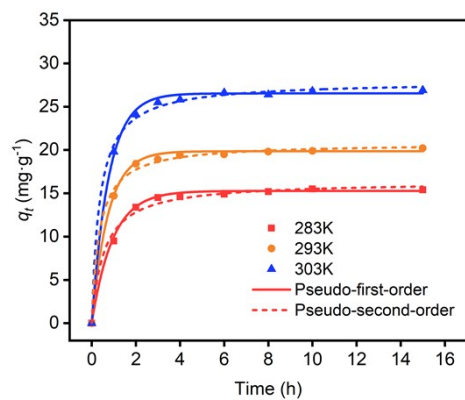

118

119 **Figure. S13.** The adsorption kinetics of uranium by Ni-BC@PO<sub>4</sub> at different temperatures. ( $C_{U(VI)}$   
 120 = 8 mg/L,  $m/V = 0.1$ ,  $T = 283$  K, 293K, and 303K,  $pH = 6$ .)

121

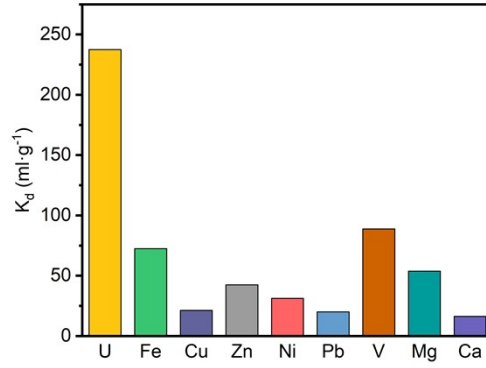

122

123 **Figure S14.** The selectivity of Ni-BC@PO<sub>4</sub> towards uranium in the presence of multiple  
124 coexisting ions. ( $C_{U(VI)} = 8$  mg/L, interfering ion concentrations aligned with uranium concentration,  $m/V =$   
125 0.1,  $T = 293K$ ,  $pH = 6$ .)

126

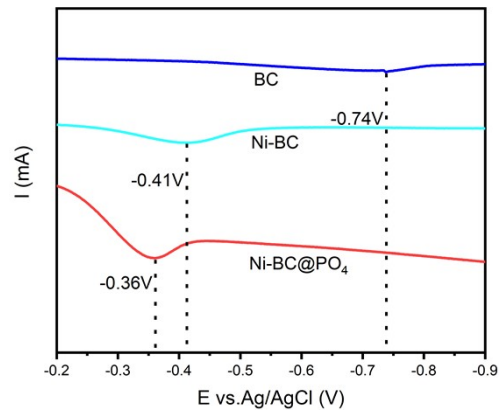

127

128 **Figure S15.** LSV spectra of BC, Ni-BC and Ni-BC@PO<sub>4</sub>.

129

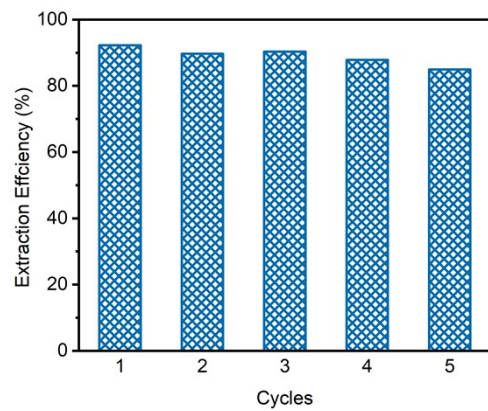

130

131 **Figure S16.** Electrochemical uranium extraction performance of Ni-BC@PO<sub>4</sub> with respect to the  
132 number of cycles.

133

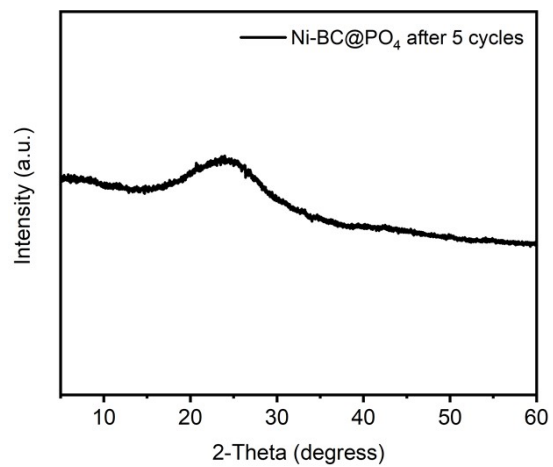

134

135 **Figure S17.** XRD spectrum of Ni-BC@PO<sub>4</sub> after 5 cycles.

136

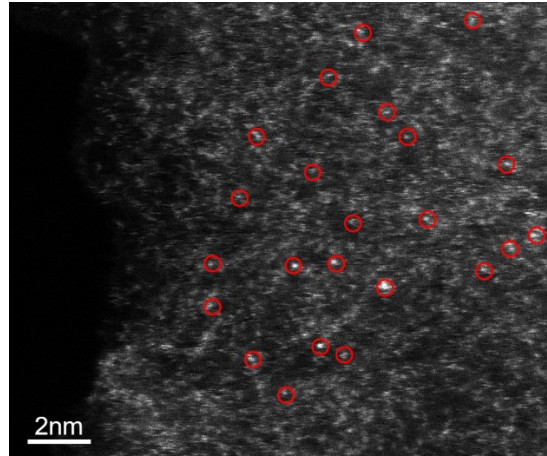

137

138 **Figure S18.** AC-TEM of Ni-BC@PO<sub>4</sub> after 5 cycles.

139

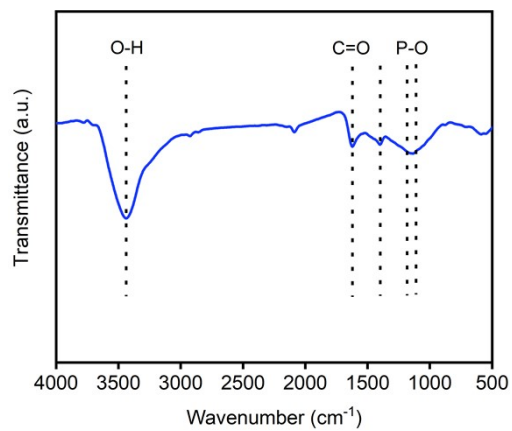

140

141 **Figure S19.** FT-IR spectrum of Ni-BC@PO<sub>4</sub> after 5 cycles.

142

143

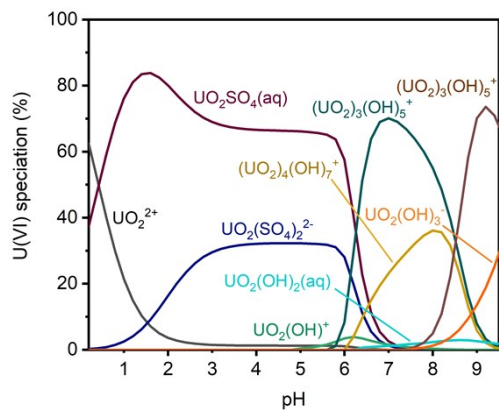

144

145 **Figure S20.** Simulating the response of uranium species in seawater to pH changes.

146



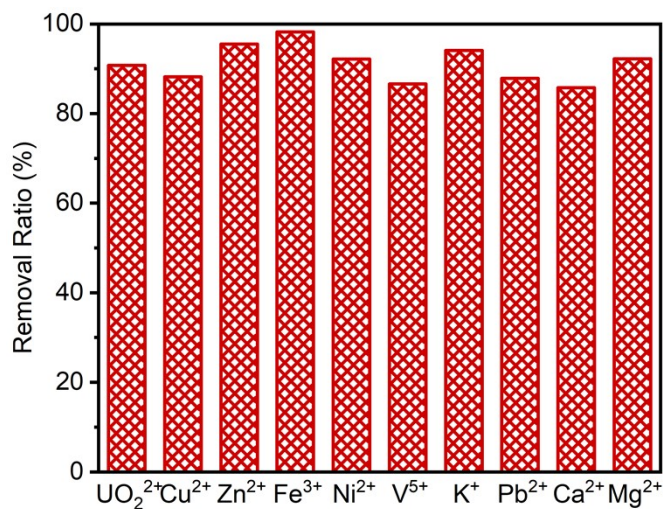

147

148 **Figure S21.** Electroextraction performance of Ni-BC@PO<sub>4</sub> for U(VI) in uranium solutions with  
 149 competitive cations and its removal effect on U(VI). ( $C_{U(VI)} = 8$  mg/L,  $C_{K(I)} = 400$ mg/L, the  
 150 concentration of other interfering ions is consistent with that of uranium,  $m/V = 0.1$ ,  $T = 293$ K,  
 151  $pH = 5.5$ ).

152

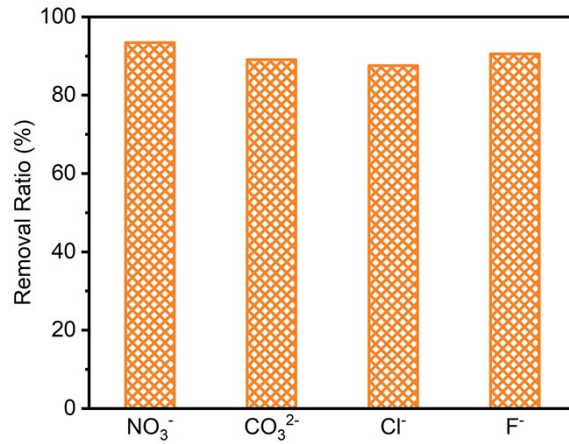

153

154 **Figure S22.** Electroextraction performance of Ni-BC@PO<sub>4</sub> for U(VI) in uranium solutions with  
155 competitive anions and its removal effect on U(VI). (The concentration of interfering ions is 0.1  
156 M 0.1 M, m/V = 0.1, T = 293K).

157

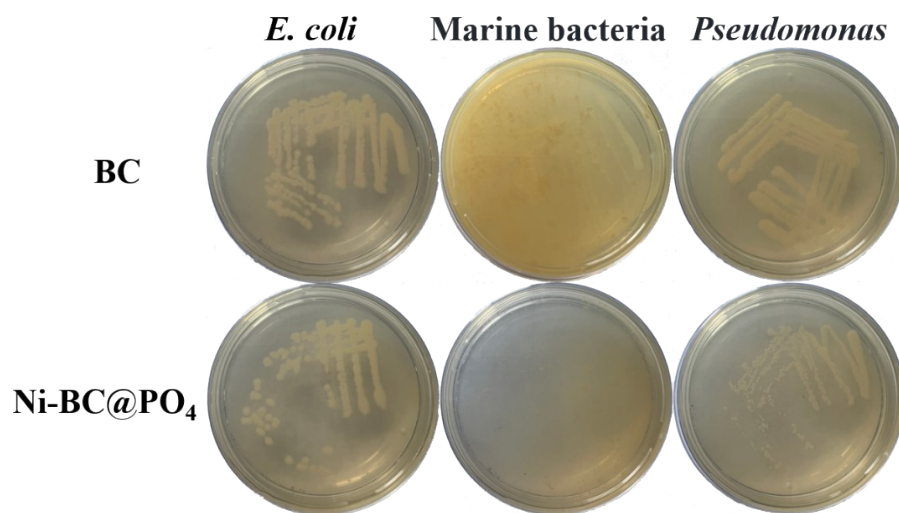

158

159 **Figure. S23.** Antibacterial evaluation of BC and Ni-BC@PO<sub>4</sub>.

160

161

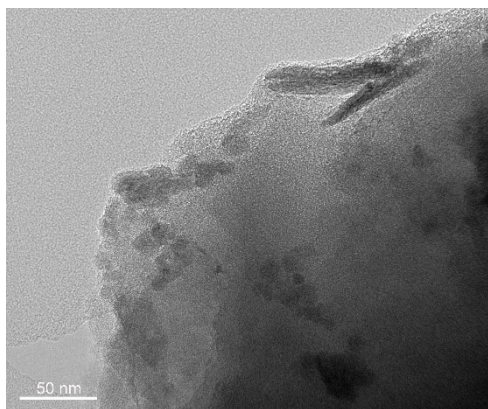

162

163 **Figure S24.** TEM images of Ni-BC@PO<sub>4</sub>-U.

164

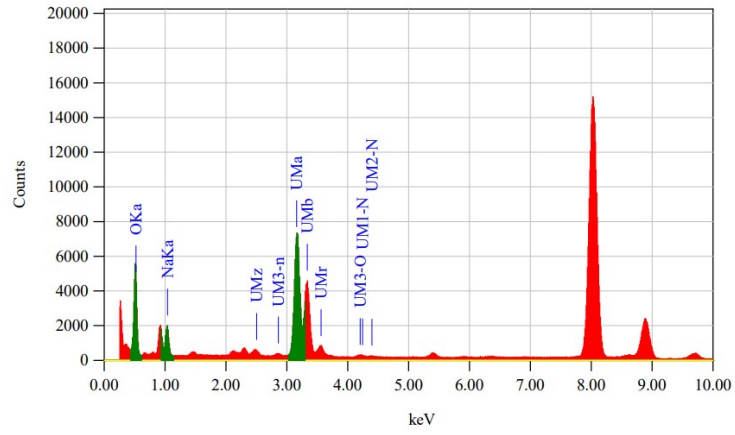

165

166 **Figure S25.** EDX spectra of Ni-BC@PO<sub>4</sub>-U.

167

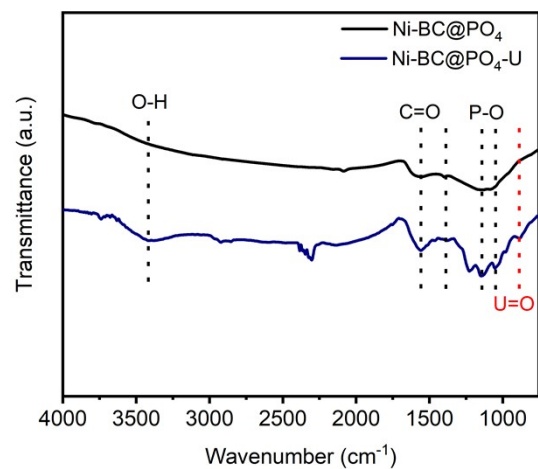

168

169 **Figure S26.** FT-IR spectra of  $\text{Ni-BC@PO}_4\text{-U}$ .

170

171 **Table S1.** Comparison of EUE property of the Ni-BC@PO<sub>4</sub> with recently reported catalysts.

| Catalyst                 | Time<br>(d) | enrichment<br>capacity                   | Ref.      |
|--------------------------|-------------|------------------------------------------|-----------|
| Ni-BC@PO <sub>4</sub>    | 0.5         | 2.86 mg·g <sup>-1</sup> ·d <sup>-1</sup> | This work |
| Zn <sup>2+</sup> -PAO    | 28          | 0.33 mg·g <sup>-1</sup> ·d <sup>-1</sup> | [S11]     |
| B-ZnO/ZnInS <sub>4</sub> | 18          | 0.22 mg·g <sup>-1</sup> ·d <sup>-1</sup> | [S7]      |
| Fe-N-C                   | 1           | 1.2 mg·g <sup>-1</sup> ·d <sup>-1</sup>  | [S15]     |
| NDA-TN-AO                | 27          | 0.23 mg·g <sup>-1</sup> ·d <sup>-1</sup> | [S12]     |
| PAO-Co                   | 42          | 0.23 mg·g <sup>-1</sup> ·d <sup>-1</sup> | [S23]     |
| DNA-UEH                  | 6           | 1.01 mg·g <sup>-1</sup> ·d <sup>-1</sup> | [S6]      |

172

173

174 **Table S2.** Materials and cost required for preparing 1g of Ni-BC@PO<sub>4</sub>

| Raw Material                                 | Price per unit | Quantity | Total price |
|----------------------------------------------|----------------|----------|-------------|
| R. japonicum L                               | free           | 3.743g   | free        |
| C <sub>2</sub> H <sub>4</sub> N <sub>2</sub> | \$0.173/g      | 1.387g   | \$0.239     |
| NiCl <sub>2</sub> ·6H <sub>2</sub> O         | \$0.074/g      | 1.387g   | \$0.103     |
| 70% phytic acid                              | \$0.069/mL     | 11.1mL   | \$0.766     |
| Total                                        | /              | /        | \$1.108     |

175 The maximum enrichment capacity of Ni-BC@PO<sub>4</sub> for uranium is 927.6mg/g. Taking into  
176 account performance losses during the cycling process, the enrichment capacity for each of the  
177 five cycles is considered to be 90% of the maximum enrichment capacity. Therefore, the material  
178 required for extracting 1kg of uranium is 1.197kg. The cost of uranium extraction per unit mass  
179 is \$264/kg.

180 Excluding material costs, the main source of energy consumption is the electrochemical  
181 uranium extraction process. The electrochemical uranium extraction is carried out at a constant  
182 voltage of -1.8V, and therefore, integrating the i-t graph yields an approximate energy  
183 consumption of 0.977 kW·h per uranium extraction cycle. With five cycles in total, the energy  
184 requirement amounts to 4.885 kW·h, resulting in an electricity cost of \$0.396.

185
